# Supplementary material for: Identification and Profiling of microRNAs and Their Target Genes from Developing Caprine Skeletal Muscle
Source: PubMed Central journal article supplement (PMC4018397; doi:10.1371/journal.pone.0096857), 2014-05-12

# Pentose Phosphate Pathway

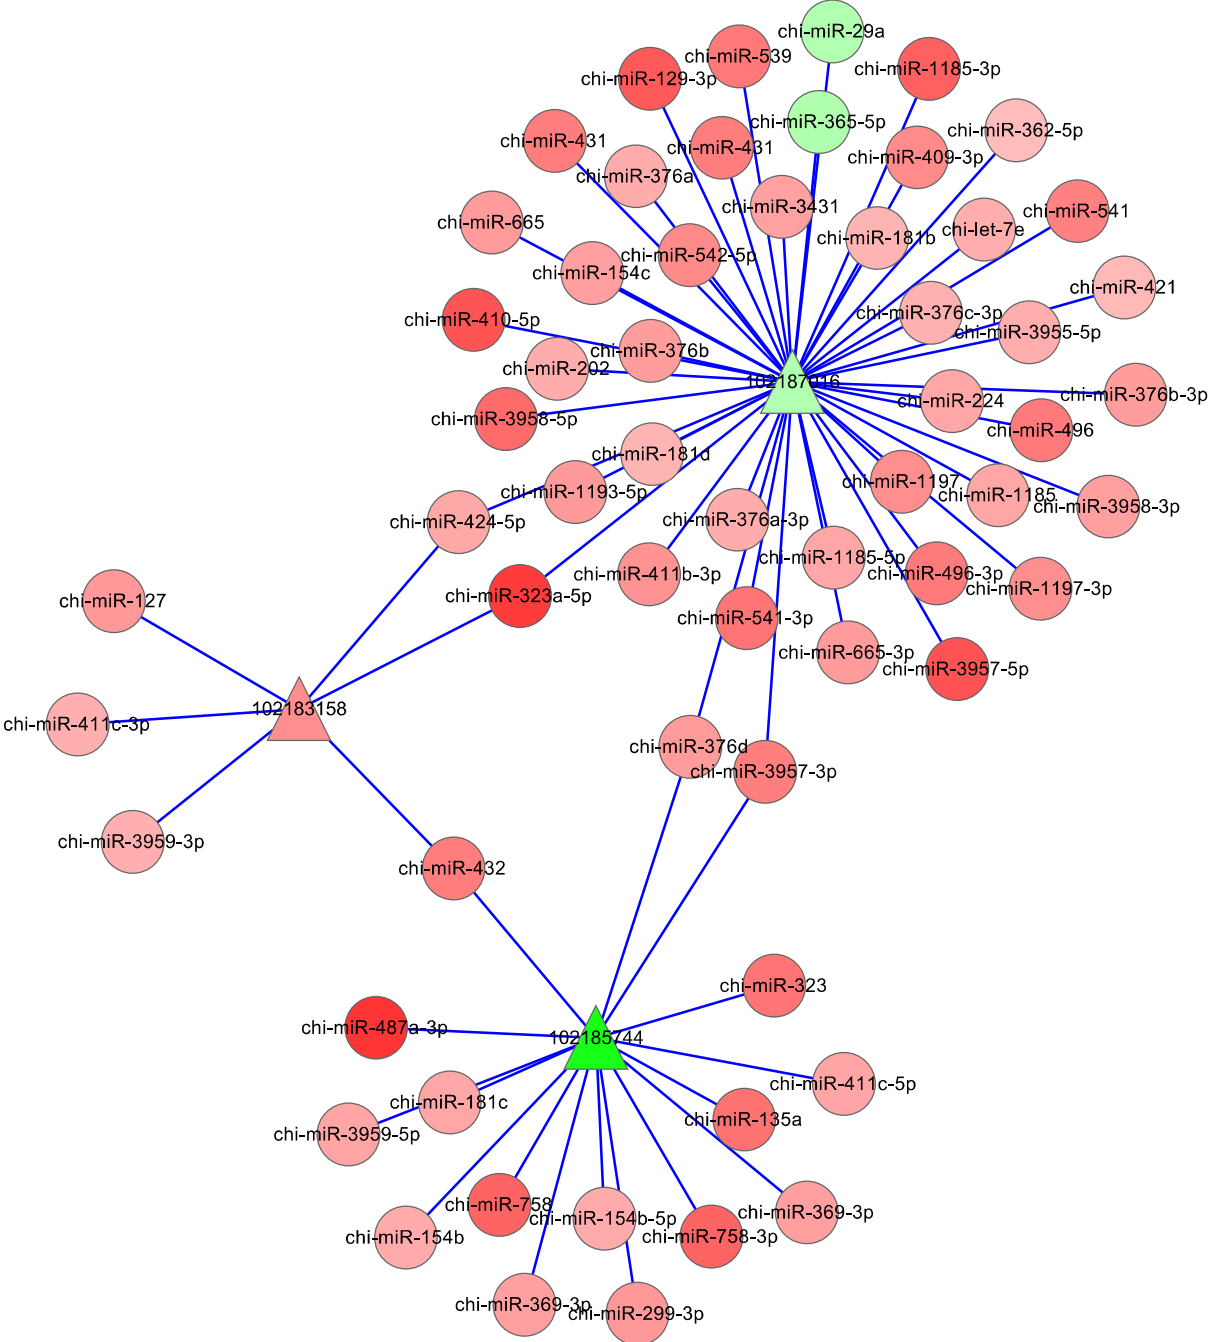

# Alzheimers Disease

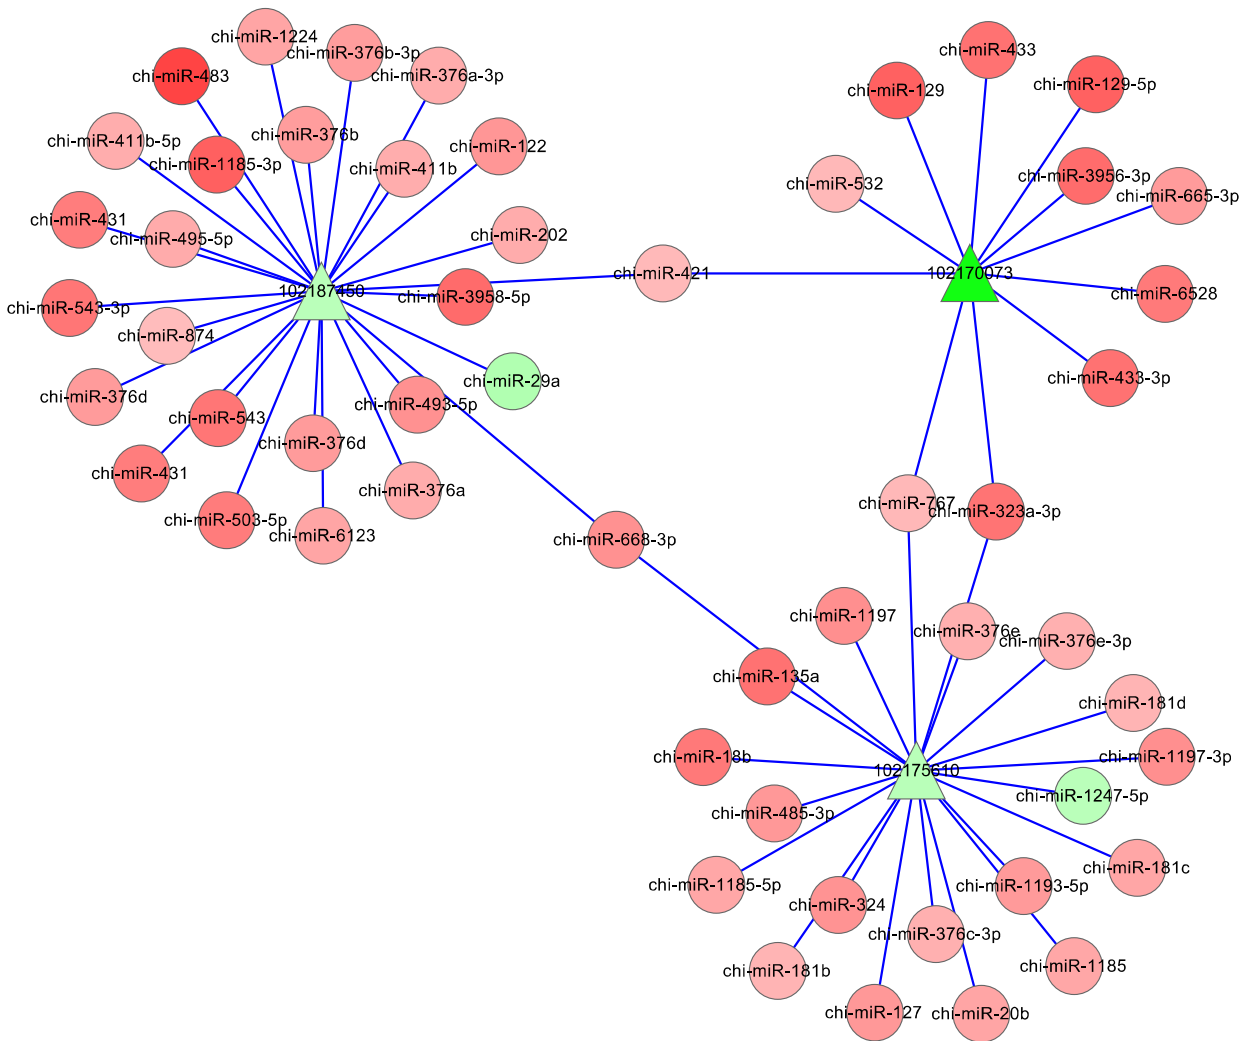

# Huntingtons Disease

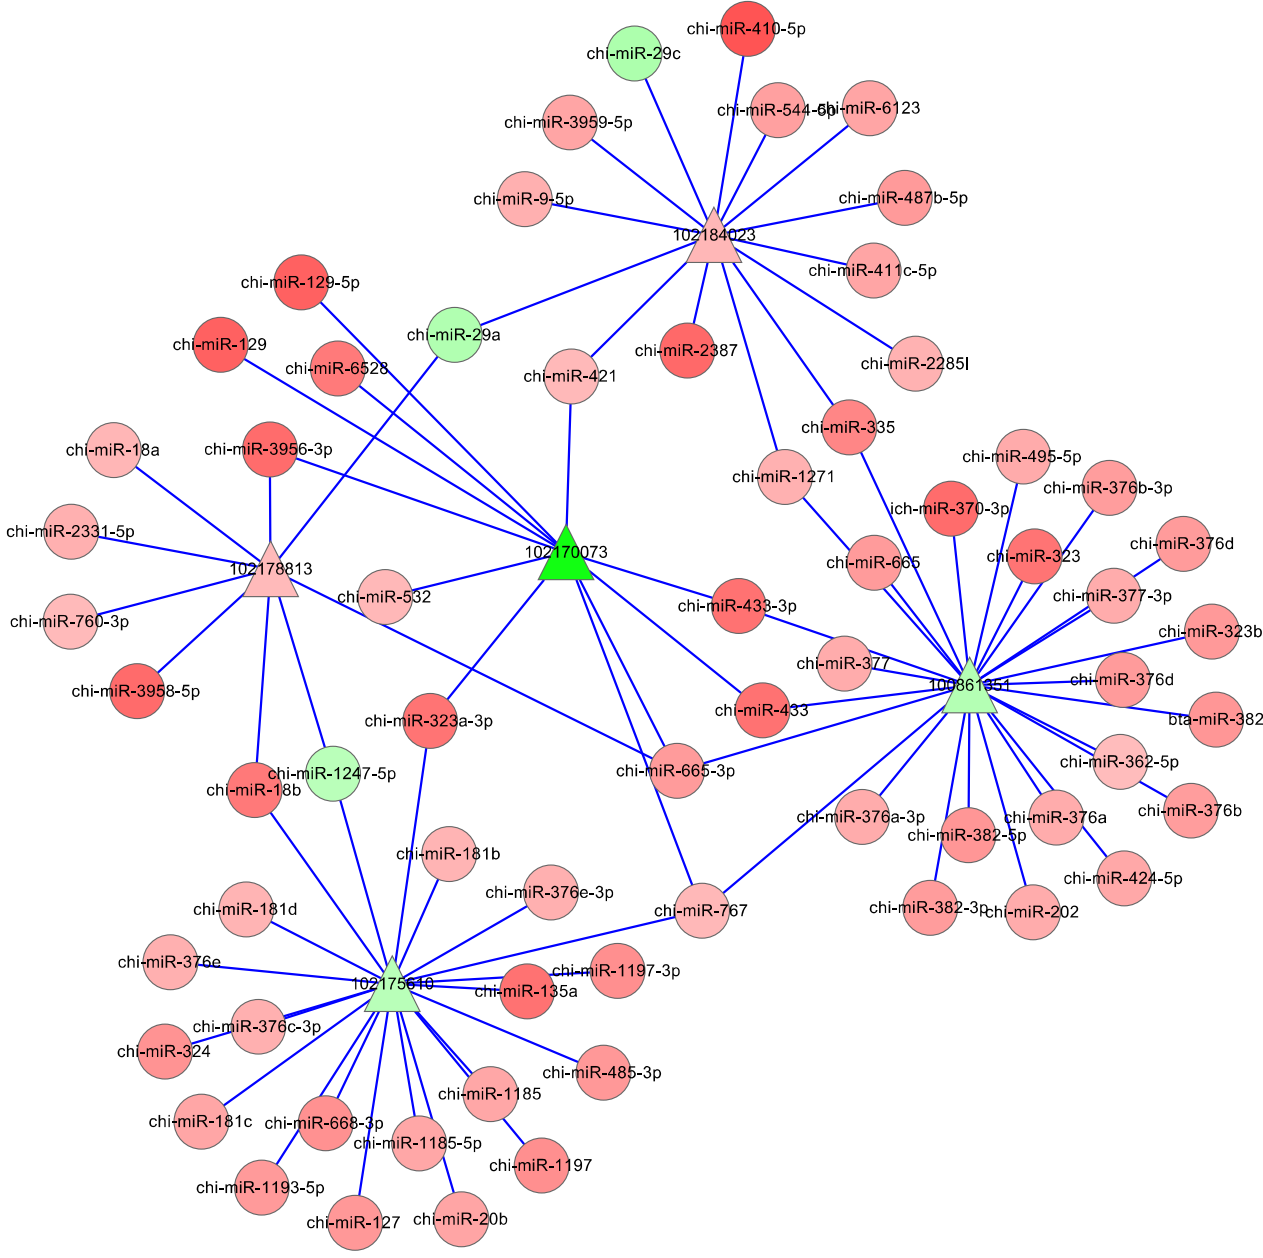

# Parkinson's Disease

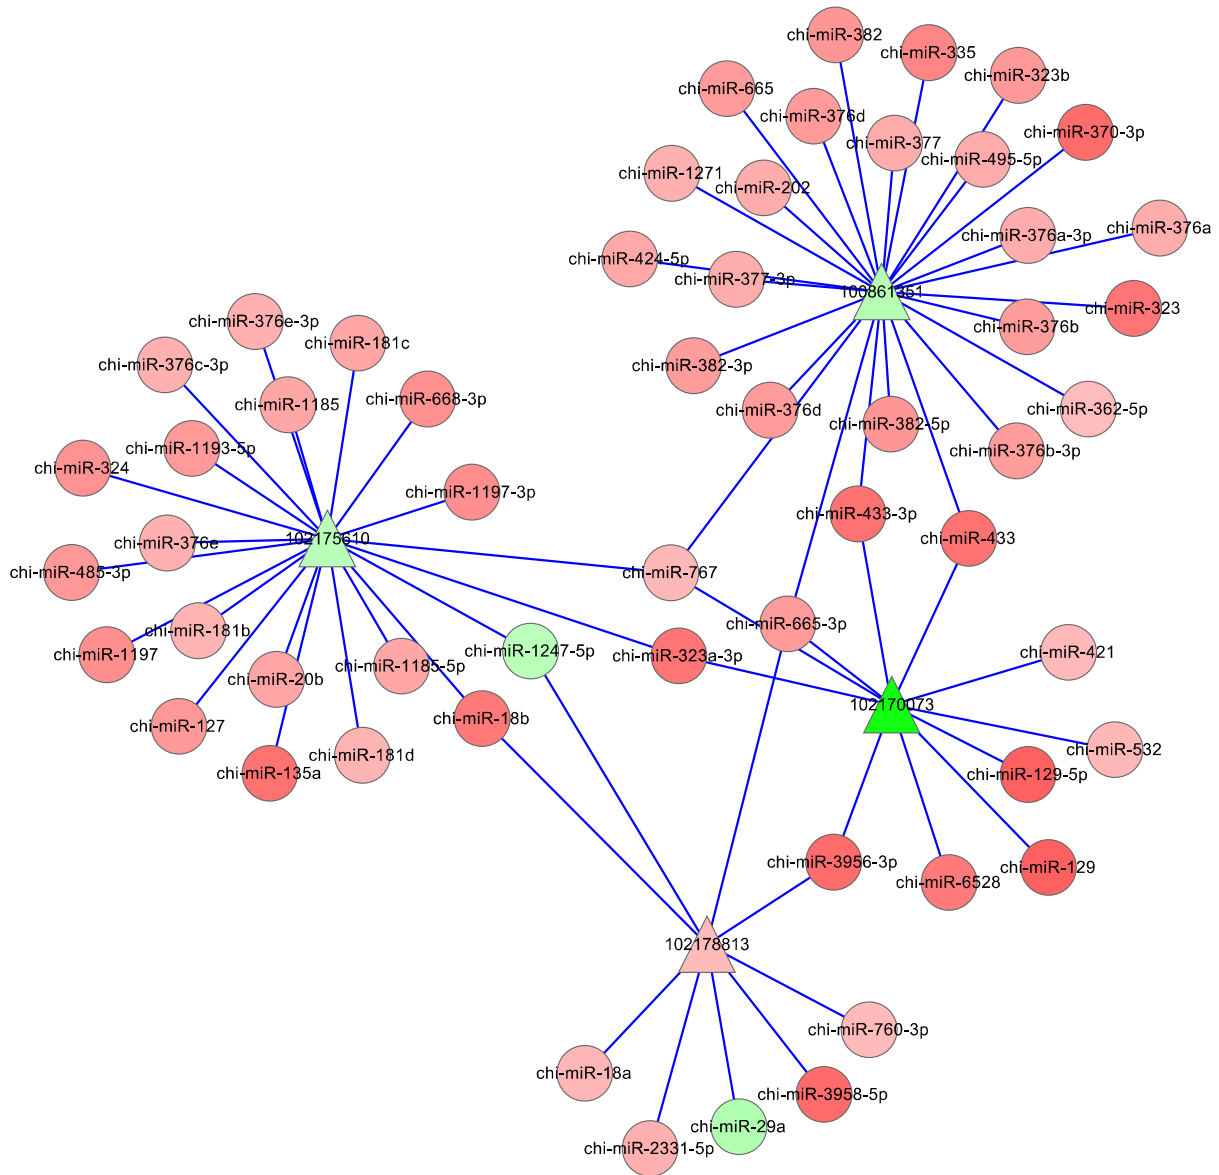

# Ribosome

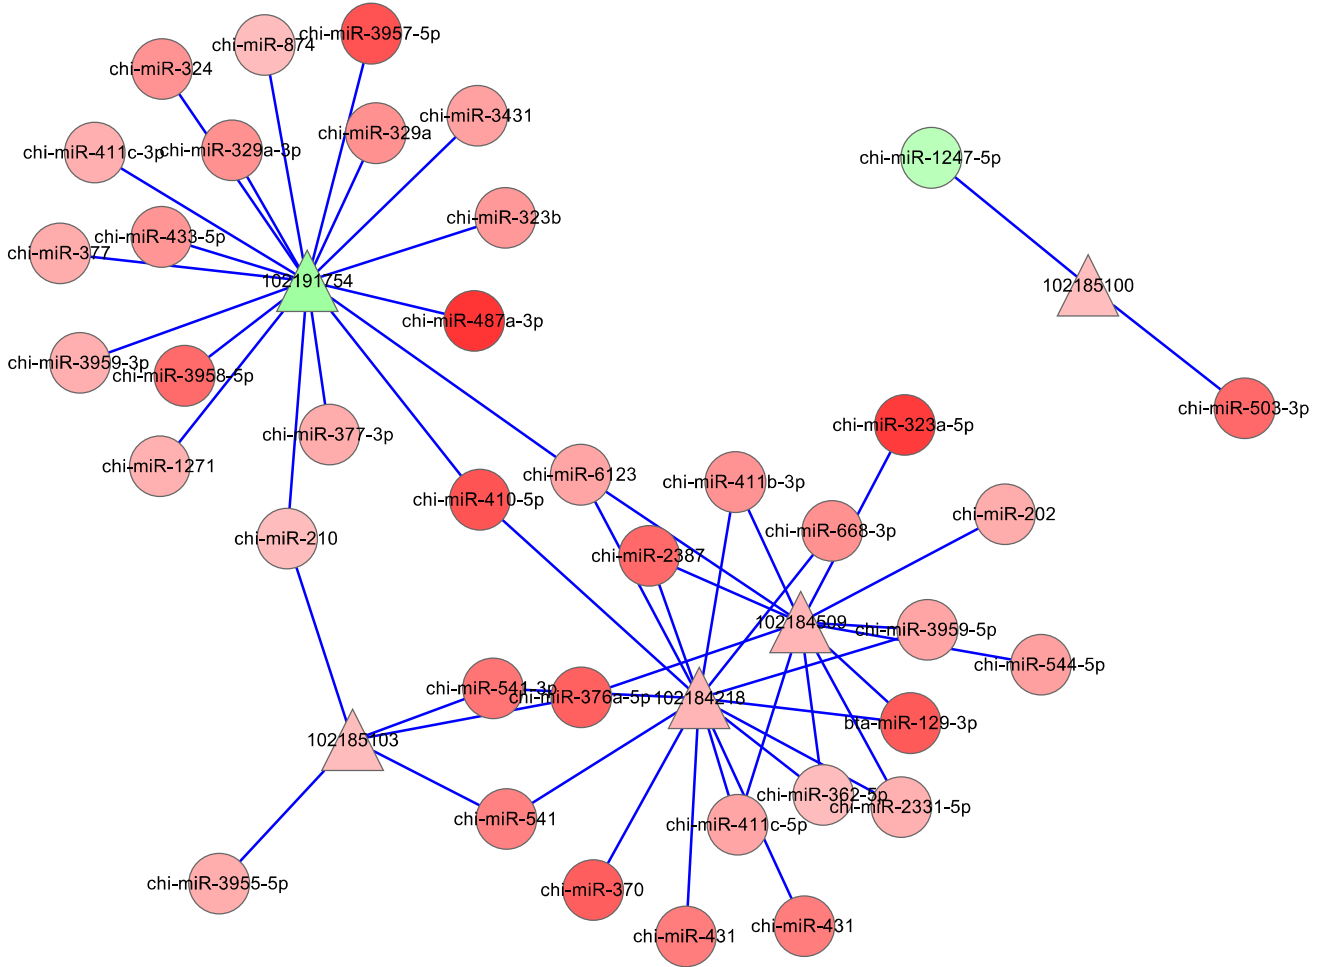

# Oxidative Phosphorylation

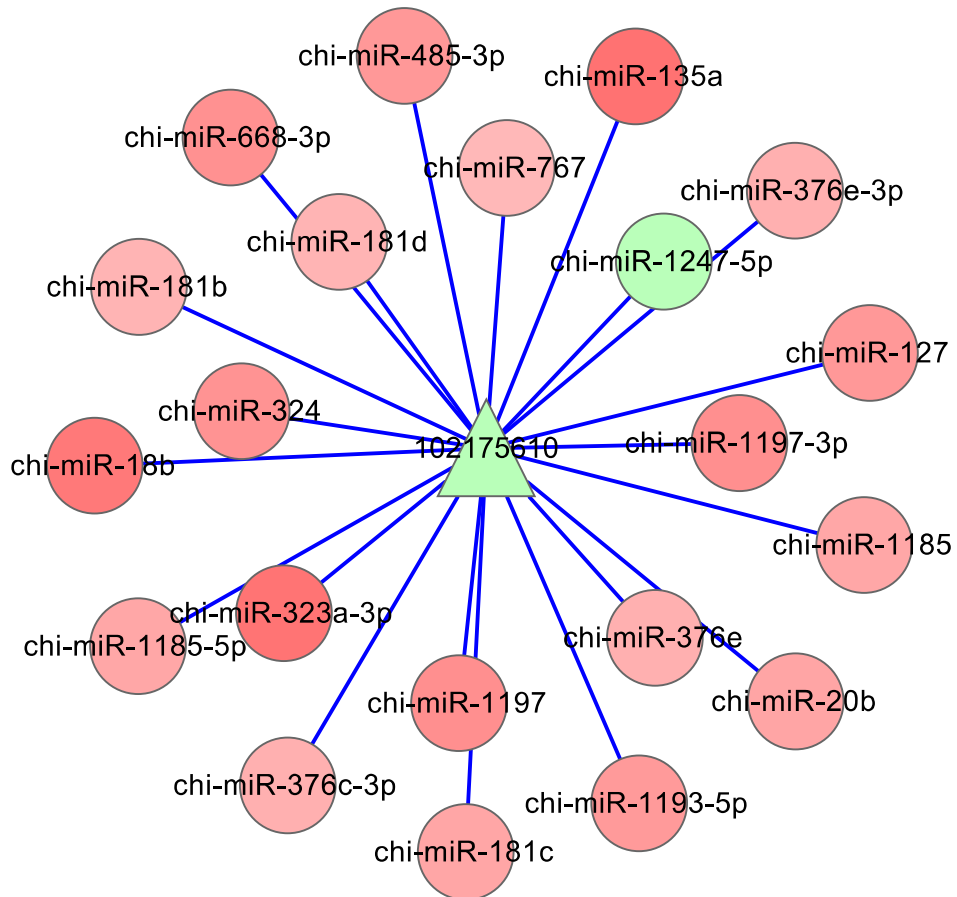

Supplement: pone.0096857.s001.pdf [file pone.0096857.s001.pdf]
